# Supplementary material
Source: PubMed Central journal article supplement (PMC6476089)
Supplement: jgme-11-02-19_s01.pdf [file jgme-11-02-19_s01.pdf]

Iyer MS, Way DP, Kline J, Wallihan R, Stanley RM. A Comparison of National Pediatric Procedures Training Guidelines With Actual Clinical Practice in Ohio. *J Grad Med Educ.* 2019;11(2):159–167.

Supplemental: Survey Instrument

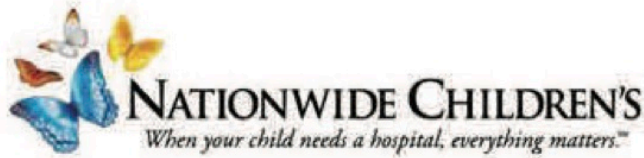

## What Procedures Do General Pediatricians Perform in Daily Practice?

Directions: Please complete this survey only if you completed a pediatrics residency. Check the answer that best matches your practice.

1. Did you complete a pediatrics or medicine-pediatrics residency program?

YES --> Go to item 2

NO --> Skip to item 7

2. Please estimate how often you personally perform each of the following procedures.

Use the option that most closely matches your practice. The numbers after each option offer guidance in estimating times per year:

|                                           | Almost Never<br>< 3      | Occasionally<br>4-11     | Monthly<br>12-26         | Almost Weekly<br>27-50   | Almost Daily<br>> 50     |
|-------------------------------------------|--------------------------|--------------------------|--------------------------|--------------------------|--------------------------|
| Bag Mask Ventilation                      | <input type="checkbox"/> |
| Bladder Catheterization                   | <input type="checkbox"/> |
| Giving Immunizations                      | <input type="checkbox"/> |
| Lumbar Puncture                           | <input type="checkbox"/> |
| Incision and Drainage of an Abscess       | <input type="checkbox"/> |
| Neonatal Endotracheal Intubation          | <input type="checkbox"/> |
| Peripheral Intravenous Catheter Placement | <input type="checkbox"/> |
| Reduction of a Simple Dislocation         | <input type="checkbox"/> |
| Simple Laceration Repair                  | <input type="checkbox"/> |
| Simple Removal of a Foreign Body          | <input type="checkbox"/> |
| Temporary Splinting of a Fracture         | <input type="checkbox"/> |
| Umbilical Catheter Placement              | <input type="checkbox"/> |
| Venipuncture                              | <input type="checkbox"/> |

3. Please list any procedures that you commonly perform (12 or more times per year) that were not on the list above.

---



---



---

Supplemental: Survey Instrument

4. From your residency training, how well prepared were you to perform these procedures? Use the following key to rate your level of preparedness.

Unprepared; Somewhat prepared; Well prepared; Not sure

|                                           | Unprepared               | Somewhat prepared        | Well prepared            | Not sure                 |
|-------------------------------------------|--------------------------|--------------------------|--------------------------|--------------------------|
| Bag Mask Ventilation                      | <input type="checkbox"/> | <input type="checkbox"/> | <input type="checkbox"/> | <input type="checkbox"/> |
| Bladder Catheterization                   | <input type="checkbox"/> | <input type="checkbox"/> | <input type="checkbox"/> | <input type="checkbox"/> |
| Giving Immunizations                      | <input type="checkbox"/> | <input type="checkbox"/> | <input type="checkbox"/> | <input type="checkbox"/> |
| Lumbar Puncture                           | <input type="checkbox"/> | <input type="checkbox"/> | <input type="checkbox"/> | <input type="checkbox"/> |
| Incision and Drainage of an Abscess       | <input type="checkbox"/> | <input type="checkbox"/> | <input type="checkbox"/> | <input type="checkbox"/> |
| Neonatal Endotracheal Intubation          | <input type="checkbox"/> | <input type="checkbox"/> | <input type="checkbox"/> | <input type="checkbox"/> |
| Peripheral Intravenous Catheter Placement | <input type="checkbox"/> | <input type="checkbox"/> | <input type="checkbox"/> | <input type="checkbox"/> |
| Reduction of a Simple Dislocation         | <input type="checkbox"/> | <input type="checkbox"/> | <input type="checkbox"/> | <input type="checkbox"/> |
| Simple Laceration Repair                  | <input type="checkbox"/> | <input type="checkbox"/> | <input type="checkbox"/> | <input type="checkbox"/> |
| Simple Removal of a Foreign Body          | <input type="checkbox"/> | <input type="checkbox"/> | <input type="checkbox"/> | <input type="checkbox"/> |
| Temporary Splinting of a Fracture         | <input type="checkbox"/> | <input type="checkbox"/> | <input type="checkbox"/> | <input type="checkbox"/> |
| Umbilical Catheter Placement              | <input type="checkbox"/> | <input type="checkbox"/> | <input type="checkbox"/> | <input type="checkbox"/> |
| Venipuncture                              | <input type="checkbox"/> | <input type="checkbox"/> | <input type="checkbox"/> | <input type="checkbox"/> |

5. Since entering practice, please list any procedures for which you pursued additional training (i.e. Took a formal course or workshop, pursued independent study or practiced skill independently).

6. Based on your experience, please rate the importance of teaching these skills to residents who plan to practice pediatrics in the future. Use the following key to rate importance.

Not at all important; Minimally important, negligible; Moderately important, but still a factor; Considerably important; Very important, critical

|                                           | Not at all               | Minimally                | Moderately               | Considerably             | Very, Critical           |
|-------------------------------------------|--------------------------|--------------------------|--------------------------|--------------------------|--------------------------|
| Bag Mask Ventilation                      | <input type="checkbox"/> |
| Bladder Catheterization                   | <input type="checkbox"/> |
| Giving Immunizations                      | <input type="checkbox"/> |
| Lumbar Puncture                           | <input type="checkbox"/> |
| Incision and Drainage of an Abscess       | <input type="checkbox"/> |
| Neonatal Endotracheal Intubation          | <input type="checkbox"/> |
| Peripheral Intravenous Catheter Placement | <input type="checkbox"/> |
| Reduction of a Simple Dislocation         | <input type="checkbox"/> |
| Simple Laceration Repair                  | <input type="checkbox"/> |
| Simple Removal of a Foreign Body          | <input type="checkbox"/> |
| Temporary Splinting of a Fracture         | <input type="checkbox"/> |
| Umbilical Catheter Placement              | <input type="checkbox"/> |

Iyer MS, Way DP, Kline J, Wallihan R, Stanley RM. A Comparison of National Pediatric Procedures Training Guidelines With Actual Clinical Practice in Ohio. *J Grad Med Educ.* 2019;11(2):159–167.

Supplemental: Survey Instrument

**Demographics– Please answer a few questions about you and your practice.**

7. In what type of setting do you practice? (Please check all that apply).

- |                                                  |                                                       |
|--------------------------------------------------|-------------------------------------------------------|
| <input type="checkbox"/> Clinic                  | <input type="checkbox"/> Newborn Nursery              |
| <input type="checkbox"/> Emergency Department    | <input type="checkbox"/> Private Practice             |
| <input type="checkbox"/> Hospital/Medical Center | <input type="checkbox"/> Urgent Care                  |
| <input type="checkbox"/> Labor & Delivery Room   | <input type="checkbox"/> Other, Please specify: _____ |

8. Please answer these additional questions about your practice environment.

- |                                                                                    | <b><u>YES</u></b>        | <b><u>NO</u></b>         |
|------------------------------------------------------------------------------------|--------------------------|--------------------------|
| Is your practice affiliated with Nationwide Children’s Hospital?                   | <input type="checkbox"/> | <input type="checkbox"/> |
| Do you have hospital admitting privileges?                                         | <input type="checkbox"/> | <input type="checkbox"/> |
| Are there multiple providers (MD, DO, NP, PA) that you work with in your practice? | <input type="checkbox"/> | <input type="checkbox"/> |
| Do you work full-time?                                                             | <input type="checkbox"/> | <input type="checkbox"/> |

9. In what year did you complete your pediatrics residency? \_\_\_\_\_

10. At what institution did you complete your pediatrics residency? \_\_\_\_\_

11. Did you complete medicine-pediatrics residency program?

- YES --> Go to item 12                       NO --> Skip to item 13

12. What percentage of your patients are children (pediatrics)? \_\_\_\_\_

13. Did you complete sub-specialty training (i.e. fellowship)?

- YES --> Go to item 14                       NO --> Skip to item 15

14. In what subspecialty did you complete fellowship training? \_\_\_\_\_

- |                                 | <b><u>FEMALE</u></b>     | <b><u>MALE</u></b>       |
|---------------------------------|--------------------------|--------------------------|
| 15. Please provide your gender. | <input type="checkbox"/> | <input type="checkbox"/> |

*Thank you for your contribution to this important project.*
